# Supplementary material for: Tuberculosis Treatment in HIV Infected Ugandans with CD4 Counts >350 Cells/mm3 Reduces Immune Activation with No Effect on HIV Load or CD4 Count
Source: PubMed Central journal article supplement (PMC2825253; doi:10.1371/journal.pone.0009138), 2010-02-22
Supplement: pone.0009138.s003.pdf [file pone.0009138.s003.pdf]

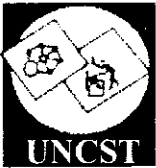

# Uganda National Council For Science and Technology

(Established by Act of Parliament of the Republic of Uganda)

Your Ref:.....

Our Ref:.....MX.838

Date:.....

23/03/09

Prof. Roy Mugerwa  
Principal Investigator  
Uganda-CASE Research Collaboration  
P.O Box 663  
Kampala

Dear Prof. Mugerwa,

The Uganda National Council for Science and Technology (UNCST) has granted your request for approval to continue with the study entitled, "**Delaying HIV disease progression with punctuated antiretroviral therapy in patients with tuberculosis in Uganda, Version 3.0, dated 6 November 2006**". The approval will expire on March 26, 2010. If, however, it is necessary to continue with the research beyond this expiry date, a request for continuation should be made to the Executive Secretary, UNCST.

The Resident District Commissioner of Kampala District in which the study will be conducted is informed by copy of this letter, and is kindly requested to give you the necessary assistance to accomplish the study.

Yours sincerely,

Leah Nawegulo  
for: Executive Secretary

**UGANDA NATIONAL COUNCIL FOR SCIENCE AND TECHNOLOGY**
