# Supplementary material for: Tuberculosis Treatment in HIV Infected Ugandans with CD4 Counts >350 Cells/mm3 Reduces Immune Activation with No Effect on HIV Load or CD4 Count
Source: PubMed Central journal article supplement (PMC2825253; doi:10.1371/journal.pone.0009138), 2010-02-22
Supplement: pone.0009138.s004.pdf [file pone.0009138.s004.pdf]

# Joint Clinical Research Centre

*Vision A Vibrant Self Sustaining Centre of Excellent in Medical Research, Training and Healthcare Services*

Plot 893 Ring Road Butikiro House- Mengo  
P O Box 10005 Kampala Uganda  
Fax 256-414- 342632  
Email [jcrc@jrcr.co.ug](mailto:jcrc@jrcr.co.ug)  
Website <http://www.jcrc.co.ug>

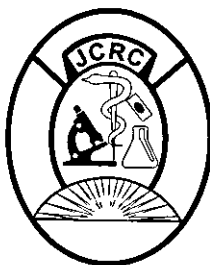

Telephone 256-414-270283  
270622  
273515  
342521  
Helpline 256-414-273062

## IRB OFFICE

**September 25, 2008**

Roy D Mugerwa, MBChB, M Med  
Principal Investigator  
Uganda – CWRU Research Collaboration  
Kampala, Uganda

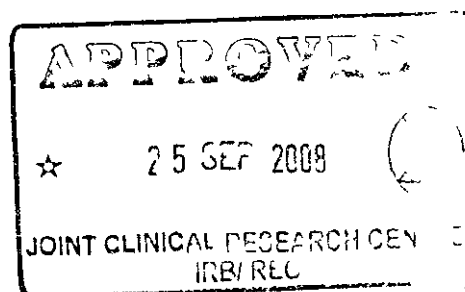

### **RE: STUDY RENEWAL APPROVAL**

Your submission of the protocol "**A151219: Delaying HIV Disease Progression with Punctuated Antiretroviral Therapy in Patients with Tuberculosis in Uganda**" version 3.0, 6 November 2006, including the request for annual renewal, annual report and consent documents was reviewed by this IRB on September 25 2008. This is to inform you that approval has been granted for study renewal, for a period of one year **with effect from October 18, 2008 to October 18, 2009.**

This is to also remind you to update and renew your study with the Uganda National Council for Science and Technology as well. We wish you luck as you continue with this important study.

Sincerely yours

Jesse Kagamba, M D , M Sc  
**Chairman JCRC-IRB/REC**

c c Uganda National Council for Science and Technology
