# Supplementary material for: Tuberculosis Treatment in HIV Infected Ugandans with CD4 Counts >350 Cells/mm3 Reduces Immune Activation with No Effect on HIV Load or CD4 Count
Source: PubMed Central journal article supplement (PMC2825253; doi:10.1371/journal.pone.0009138), 2010-02-22
Supplement: pone.0009138.s005.pdf [file pone.0009138.s005.pdf]

**UNIVERSITY HOSPITALS CASE MEDICAL CENTER**  
**INSTITUTIONAL REVIEW BOARD FOR HUMAN INVESTIGATION**

The University Hospitals Institutional Review Board has reviewed the proposal and informed consent

Submitted by: Whalen, Christopher and Mahan, Scott

Entitled: Delaying HIV Disease Progression with Punctuated Antiretroviral Therapy in Patients with Tuberculosis in Uganda

UH IRB Number: 11-03-04

---

Please be advised that with respect to: (1) The rights and welfare of the individuals  
(2) The appropriateness of the methods to be used to secure informed consent  
(3) The risks and potential medical benefits of the investigation

**The Board Considers This Project:**

- FULLY ACCEPTABLE, without reservation; approved through** 11/10/2009  
 **NOT ACCEPTABLE for reasons noted:**

**REMARKS:** The continuing review is due by the date noted above.

IRB requires prompt reporting of the completion of a study.

Please reference the IRB number on future reviews and correspondence

**Expedited Approval per 45 CFR 46.110(b)(2)**

**Changes to Protocol**

**Changes to Consent Form (English consent)**

**Changes to Consent Form (Lugandan consent)**

**HIPAA Authorization Revised (Privacy Board)**

**Pregnant Women/Fetuses under 45 CFR 46.204**

Date of Committee Review:

Date of Approval: 3/3/2009

TYPE PROJECT  New  Renewal  Addendum/Amendment

HUMAN RISK  Yes  No

SOURCE OF SUPPORT  None  Departmental  Outside Funding

Agency: NIH

Agency Study Number: AI51219

ARE ANY OF THE FOLLOWING INVOLVED?  No  Yes

Minors  Neonates  Fetuses/Abortuses  Prisoners  Pregnant Women  Mentally Retarded  Mentally Disabled

Protocols involving children approved under

45 CFR 46.404  45 CFR 46.405  45 CFR 46.406\*

\*Both parents must give their permission unless one parent is deceased, unknown, incompetent, or not reasonably available, or when only one has legal responsibility for the care and custody of the child.

***The UHCMC IRB operates under the HHS Federal Wide Assurance of Compliance number 00003937 and IRB registration numbers 00000684 and 00001691***

---

Joseph Gibbons, MD, Chairman;  
Barbara Daly, PhD, RN, Vice Chair; or Claudia Hoyen, MD, Vice Chair, or Paul Smith, DO, Vice Chair

EZ

Revised 09/01/2004
